# Supplementary material for: The association between adolescent suicide rates and socioeconomic indicators in Brazil: a 10-year retrospective ecological study
Source: PubMed Central journal article supplement — Braz J Psychiatry. 2019 Feb 18;41(5):389–95. doi: 10.1590/1516-4446-2018-0223 (PMC6796813; doi:10.1590/1516-4446-2018-0223), 2019-02-18
Supplement: bjp-41-05-389-s001.pdf [file bjp-41-05-389-s001.pdf]

**Table S1** Correlation coefficients between age-adjusted adolescent suicide rates and socioeconomic indicators for six large Brazilian cities

| Cities             | Adolescent suicide rate, 10- to 14-year-olds |                   |            |                |                   |            |                |                   |            | Adolescent suicide rate, 15- to 19-year-olds |                   |            |                |                   |            |                |                   |            | Total adolescent suicide rate, 10- to 19-year-olds |                   |            |                |                   |            |                |                   |            |
|--------------------|----------------------------------------------|-------------------|------------|----------------|-------------------|------------|----------------|-------------------|------------|----------------------------------------------|-------------------|------------|----------------|-------------------|------------|----------------|-------------------|------------|----------------------------------------------------|-------------------|------------|----------------|-------------------|------------|----------------|-------------------|------------|
|                    | Total                                        |                   |            | Male           |                   |            | Female         |                   |            | Total                                        |                   |            | Male           |                   |            | Female         |                   |            | Total                                              |                   |            | Male           |                   |            | Female         |                   |            |
|                    | GDP per capita                               | Unemployment rate | Gini index | GDP per capita | Unemployment rate | Gini index | GDP per capita | Unemployment rate | Gini index | GDP per capita                               | Unemployment rate | Gini index | GDP per capita | Unemployment rate | Gini index | GDP per capita | Unemployment rate | Gini index | GDP per capita                                     | Unemployment rate | Gini index | GDP per capita | Unemployment rate | Gini index | GDP per capita | Unemployment rate | Gini index |
| Six cities grouped | 0.02                                         | 0.12              | -0.05      | 0.15           | -0.10             | -0.17      | 0.08           | 0.16              | 0.04       | 0.41**                                       | -0.33**           | -0.41**    | 0.50**         | -0.41**           | -0.52**    | 0.21           | -0.12             | -0.06      | 0.35**                                             | -0.31*            | -0.41      | 0.47**         | -0.40**           | -0.53      | 0.16           | -0.05             | -0.02      |
| Porto Alegre       | 0.03                                         | 0.42              | -0.15      | 0.07           | -0.03             | -0.14      | -0.68*         | 0.68*             | 0.59       | 0.04                                         | -0.03             | -0.07      | 0.13           | -0.04             | -0.01      | 0.18           | -0.31             | 0.29       | -0.10                                              | 0.20              | 0.15       | 0.22           | 0.03              | -0.22      | -0.11          | -0.05             | 0.41       |
| Recife             | -0.23                                        | 0.41              | 0.17       | 0.07           | -0.07             | -0.16      | -0.20          | 0.41              | 0.23       | -0.46                                        | 0.32              | 0.16       | -0.35          | 0.19              | 0.03       | -0.44          | 0.59              | 0.44       | -0.37                                              | 0.33              | 0.07       | -0.25          | 0.09              | -0.06      | -0.48          | 0.67*             | 0.46       |
| Belo Horizonte     | 0.15                                         | -0.15             | -0.45      | 0.31           | -0.31             | -0.34      | 0.08           | -0.08             | -0.43      | 0.09                                         | -0.09             | -0.10      | 0.18           | -0.18             | -0.16      | -0.06          | 0.06              | 0.00       | 0.04                                               | -0.04             | -0.20      | 0.29           | -0.29             | -0.28      | -0.04          | 0.04              | -0.11      |
| Salvador           | 0.25                                         | -0.40             | 0.17       | 0.44           | -0.53             | 0.29       | -0.27          | 0.20              | -0.09      | 0.41                                         | -0.43             | 0.02       | 0.44           | -0.49             | 0.22       | 0.55           | -0.59             | -0.43      | 0.52                                               | -0.58             | 0.02       | 0.55           | -0.58             | 0.22       | 0.55           | -0.58             | -0.38      |
| Rio de Janeiro     | -0.26                                        | 0.16              | 0.23       | 0.06           | -0.14             | -0.03      | -0.08          | -0.01             | 0.06       | 0.25                                         | -0.30             | -0.33      | 0.52           | -0.57             | -0.47      | -0.44          | 0.42              | 0.44       | 0.26                                               | -0.33             | -0.32      | 0.43           | -0.50             | -0.39      | -0.44          | 0.42              | -0.43      |
| São Paulo          | -0.18                                        | 0.10              | -0.29      | -0.06          | 0.07              | 0.02       | -0.27          | 0.20              | -0.38      | -0.06                                        | 0.32              | -0.40      | -0.35          | 0.58              | -0.23      | 0.42           | -0.42             | -0.25      | -0.02                                              | 0.12              | -0.46      | -0.20          | 0.39              | -0.21      | 0.35           | -0.33             | -0.56      |

GDP = gross domestic product.

\* Spearman's rho correlation coefficient is significant at the 0.05 level (2-tailed).

\*\* Spearman's rho correlation coefficient is significant at the 0.01 level (2-tailed).
